# Supplementary material for: Epigenetic synergy between decitabine and platinum derivatives
Source: PubMed Central journal article supplement (PMC4567801; doi:10.1186/s13148-015-0131-z), 2015-09-11
Supplement: 13148_2015_131_MOESM1_ESM.pdf [file 13148_2015_131_MOESM1_ESM.pdf]

**Table S1. Top functional annotation categories of genes upregulated by carboplatin.**

| Functional category | Number of genes | P value* | Genes                                                                                                                                                                                                                                                                                                                                                                                                                                                                                                                                                                                                                                                                                                                                                                                                                        |
|---------------------|-----------------|----------|------------------------------------------------------------------------------------------------------------------------------------------------------------------------------------------------------------------------------------------------------------------------------------------------------------------------------------------------------------------------------------------------------------------------------------------------------------------------------------------------------------------------------------------------------------------------------------------------------------------------------------------------------------------------------------------------------------------------------------------------------------------------------------------------------------------------------|
| mitochondrion       | 111             | 0.002    | ALDH1B1, CAV1, L2HGDH, GRPEL1, C8orf38, C9orf46, PRODH, TAZ, ATP5O, VDACC2, DCAKD, MTCP1NB, MRPS6, NDUFC1, MRPS35, MRPL40, GLOD4, MPV17, GPX1, PAX9, BCL2L1, IARS2, ACAT1, TYMS, CRLS1, PTPMT1, FKBP8, MECR, DDIT4, AATK, RFK, AGXT2L2, SLC25A37, BAK1, SFXN4, NDUFAF3, GOT2, UNG, C1orf151, FAM82A2, IDH1, PMAIP1, RHOT2, MRPS36, ABCD3, SLC25A20, METTL12, DLD, MRPS15, MRPL10, PISD, PROSC, MCL1, ACOT8, AUH, CLTC, COX8A, IREB2, SLC25A46, ATP5L, AIFM2, PRKACA, C17orf89, SNN, BBC3, SQRD, RILP, BNIP3L, MRPL38, IDI1, ECSIT, SPATA18, UXS1, SDSL, POLRMT, GTPBP3, NUDT8, NDUFA8, XRCC3, ETHE1, DNLZ, BRI3BP, GLS2, RAB35, MTG1, SLC25A17, ABCB6, BRP44L, JTB, NLRX1, ECH1, GRAMD4, YRDC, ME1, HAX1, FTSJ2, SCO1, TIMM13, VPS25, NOP14, AFG3L2, NDUFA3, PSMA6, SLC22A4, MYCBP, MRP63, ATP5I, ZBTB9, FXN, FDXR, KIAA0141 |
| apoptotic process   | 48              | 0.033    | CYFIP2, PHLDA1, IER3, ZMAT3, PSMB4, SGMS1, CCAR1, CLSPN, PPP1R15A, HTT, PLK3, BCL2L1, ARHGEF7, MFSD10, FKBP8, RNF41, DDIT4, AATK, MDM4, BAK1, PHLDA3, DRAM1, EGLN3, SGPP1, MKNK2, FAM82A2, PMAIP1, RHOT2, MCL1, AEN, NTN1, BBC3, ECE1, LGALS7B, GADD45A, EPHA2, ITM2B, AXIN1, TNFRSF12A, TNFRSF10B, GRAMD4, PSMD11, PSMB10, TGFBR2, PSMA6, TNFRSF10D, PAK6, KIAA0141                                                                                                                                                                                                                                                                                                                                                                                                                                                         |

\*hypergeometric P value corrected for multiple testing

**Table S2. Top functional annotation categories of genes downregulated by carboplatin.**

| Functional category | Number of genes | P value* | Genes                                                                                                                                                                                                                           |
|---------------------|-----------------|----------|---------------------------------------------------------------------------------------------------------------------------------------------------------------------------------------------------------------------------------|
| cell division       | 25              | 0.00004  | CENPF, ANXA11, FBXO5, PDS5B, PTTG1, OIP5, NCAPH, LMLN, PHF13, HAUS5, POGZ, UBE2C, NCAPD2, KIAA1009, ASPM, CDC20, BUB3, CCNB2, BUB1, CIT, KIF20B, CEP55, CKS2, SPAG5, CCNA2                                                      |
| cell cycle          | 32              | 0.00008  | UHRF1, CDKN1B, ANXA11, CHAF1A, RAB11B, RPS6KA3, GAS1, PDS5B, OIP5, CDKN3, MAP3K8, NCAPH, LMLN, HAUS5, LIN9, POGZ, GSG2, PRC1, UBE2C, NCAPD2, KIAA1009, MELK, E2F8, ARL3, ASPM, CDC20, CIT, KIF20B, CEP55, CKS2, C15orf42, SPAG5 |
| DNA replication     | 17              | 0.00036  | CENPF, POLQ, CHAF1A, POLD3, RFC3, POLA1, POLE2, TK1, BLM, MCM9, LIN9, GINS2, DUT, RMI1, TOP2A, GINS3, C15orf42                                                                                                                  |

\*hypergeometric P value corrected for multiple testing

**Table S3. Functional annotation of genes upregulated by decitabine and carboplatin (DAC+Carbo).**

| Functional category | Number of genes | P value* | Genes                                        |
|---------------------|-----------------|----------|----------------------------------------------|
| cell adhesion       | 6               | 0.00423  | HES5, IGFBP7, PSTPIP1, MYBPC3, THBS1, COL5A1 |
| apoptotic process   | 5               | 0.04282  | TNFRSF10C, PLEKHF1, PREX1, PDIA2, NGFRAP1    |
| integrin signalling | 3               | 0.00015  | COL9A2, COL5A1, COL8A2                       |

\*hypergeometric P value corrected for multiple testing
