# Supplementary material for: Epigenetic synergy between decitabine and platinum derivatives
Source: PubMed Central journal article supplement (PMC4567801; doi:10.1186/s13148-015-0131-z), 2015-09-11
Supplement: 13148_2015_131_MOESM2_ESM.pdf [file 13148_2015_131_MOESM2_ESM.pdf]

**Table S4. Primers for bisulfite pyrosequencing.**

| Name of Gene     | Primer Type*        | Sequence                                                                                                                                                |
|------------------|---------------------|---------------------------------------------------------------------------------------------------------------------------------------------------------|
| CMV              | F<br>RU<br>S        | GGGGTGGAGATTTGGAAATT<br><u>GGGACACCGCTGATCGTTT</u> ACCCACTTAACAATACATCAAATATATCA<br>TGGAGATTTGGAAATTT                                                   |
| P16              | F<br>RU<br>S        | GGTTGTTTTYGGTTGGTGT<br><u>GGGACACCGCTGATCGTTT</u> AACCCTATCCCTCAAATCCT<br>AGTTAGGTGTGGGATATAGT                                                          |
| PGR              | F<br>RU<br>S        | TGTGGGTGGTATTTTTAATGAGA<br><u>GGGACACCGCTGATCGTTT</u> ACCCCTCACTAAAACCTAAA<br>GGGATTTGAGATTTT                                                           |
| MLH1             | F1<br>F2<br>RU<br>S | TTGAGTTAGATTATTTTAGTAGAGGTATAT<br>GGTATTTTTGTTTTATTGGTTGGATATT<br><u>GGGACACCGCTGATCGTTT</u> ACCAATCAAATTTCTCAACTCTATAAATTACTA<br>TTTAAAAAGAATTAATAGGAA |
| PDLIM4           | F<br>RU<br>S        | TTTGTGAGTTTGGATTGGT<br><u>GGGACACCGCTGATCGTTT</u> ACCCCAAATAAACCTCCAT<br>TTTATTTAGTTTTAGAGAT                                                            |
| NPM2             | F<br>RU<br>S        | TTTTTAGGTTAGAGGGGATGAG<br><u>GGGACACCGCTGATCGTTT</u> ATAAACCTAACTCAAAAACCTCTATA<br>GTTAGAGGGGATGAGGT                                                    |
| OLIG2            | F<br>RU<br>S        | TTTTAAAGGTGAGGATGTTTATTAT<br><u>GGGACACCGCTGATCGTTT</u> AAAAATCCAAACCCCTATAT<br>AGGTGAGGATGTTTATTATA                                                    |
| LINE-1           | F<br>Bio-R          | TTTTGAGTTAGGTGTGGGATATA<br>Biotin-AAAATCAAAAAATCCCTTTC                                                                                                  |
| Biotin-Universal | BU                  | Biotin- <u>GGGACACCGCTGATCGTTT</u>                                                                                                                      |

Primer type: F, forward; RU, reverse primer with the 5'-GGGACACCGCTGATCGTTT universal tag; BU, universal primer with 5'-biotin for biotin labeling of the reverse strands; S, pyrosequencing primer.

**Table S5. Primers for CHIP Q-PCR.**

| Name of Gene   | Primer Type                  | Sequence 5' → 3'                                                                  |
|----------------|------------------------------|-----------------------------------------------------------------------------------|
| GFP            | Forward<br>Reverse<br>Probe* | CATCTACGTATTAGTCATCGCTATTACCA<br>TCAATGGGCGTGGATAG<br>6-FAM GAAATCCCCGTGAGTCAAACC |
| MLH1           | Forward<br>Reverse<br>Probe* | TTCCGTTGAGCATCTAGACGTTT<br>CCTGCCACGAACGACATTTT<br>6-FAMCTTGGCTCTTCTGGCGC         |
| P16            | Forward<br>Reverse<br>Probe* | CCCGCCCGTTTCCT<br>CCGATTCAATTTGGCAGTTAGG<br>6-FAMTCCGCGATACAACCT                  |
| RAR $\beta$ -2 | Forward<br>Reverse<br>Probe* | TTGGAAGGAGAACTTGGGATCTT<br>AGGCTTGCTCGGCCAATC<br>6-FAMCTGGGAACCCCCC               |
| ESR1           | Forward<br>Reverse<br>Probe* | GCGGCCACGGACCAT<br>TAGGGCCATCCCAGATGCT<br>6-FAMCCATGACCCTCCACACC                  |

\*The TaqMan<sup>®</sup> probes were labeled with 6-FAM<sup>™</sup> on the 5' end and with minor groove binder (MGB) and nonfluorescent quencher (NFQ) on the 3' end.
